# Supplementary material for: Highly porous metal oxide polycrystalline nanowire films with superior performance in gas sensors
Source: Royal Society of Chemistry journal article supplement (doi:10.1039/c1jm10537j), 2011-01-01
Supplement: c1jm10537j.pdf [file c1jm10537j.pdf]

*Supporting Information*

---

**Highly Porous Metal Oxide Polycrystalline Nanowire Films with Superior Performance  
in Gas Sensors**

*Jun Liu<sup>a</sup>, Zaiping Guo<sup>\*a</sup>, Kaixing Zhu<sup>b</sup>, Wenjun Wang<sup>b</sup>, Chaofeng Zhang<sup>a</sup>, and Xiaolong  
Chen<sup>\*b</sup>*

<sup>a</sup> Institute for Superconducting and Electronic Materials, University of Wollongong, NSW 2522,  
Australia

<sup>b</sup> Beijing National Laboratory for Condensed Matter Physics, Institute of Physics, Chinese Academy  
of Sciences, P.O. Box 603, Beijing 100190

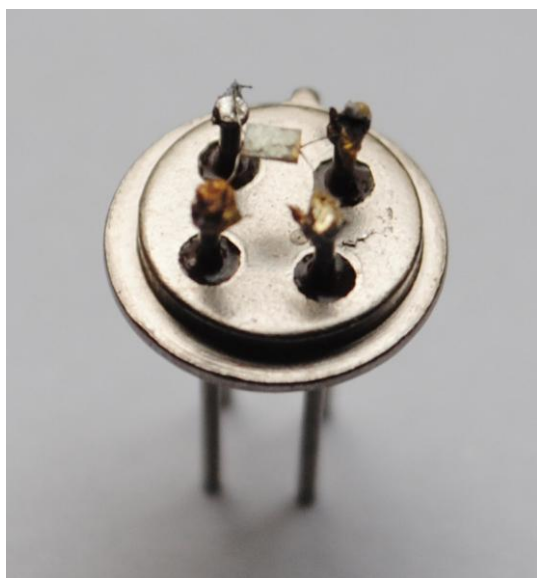

**Figure SI-1** A photograph of an example sensor device.

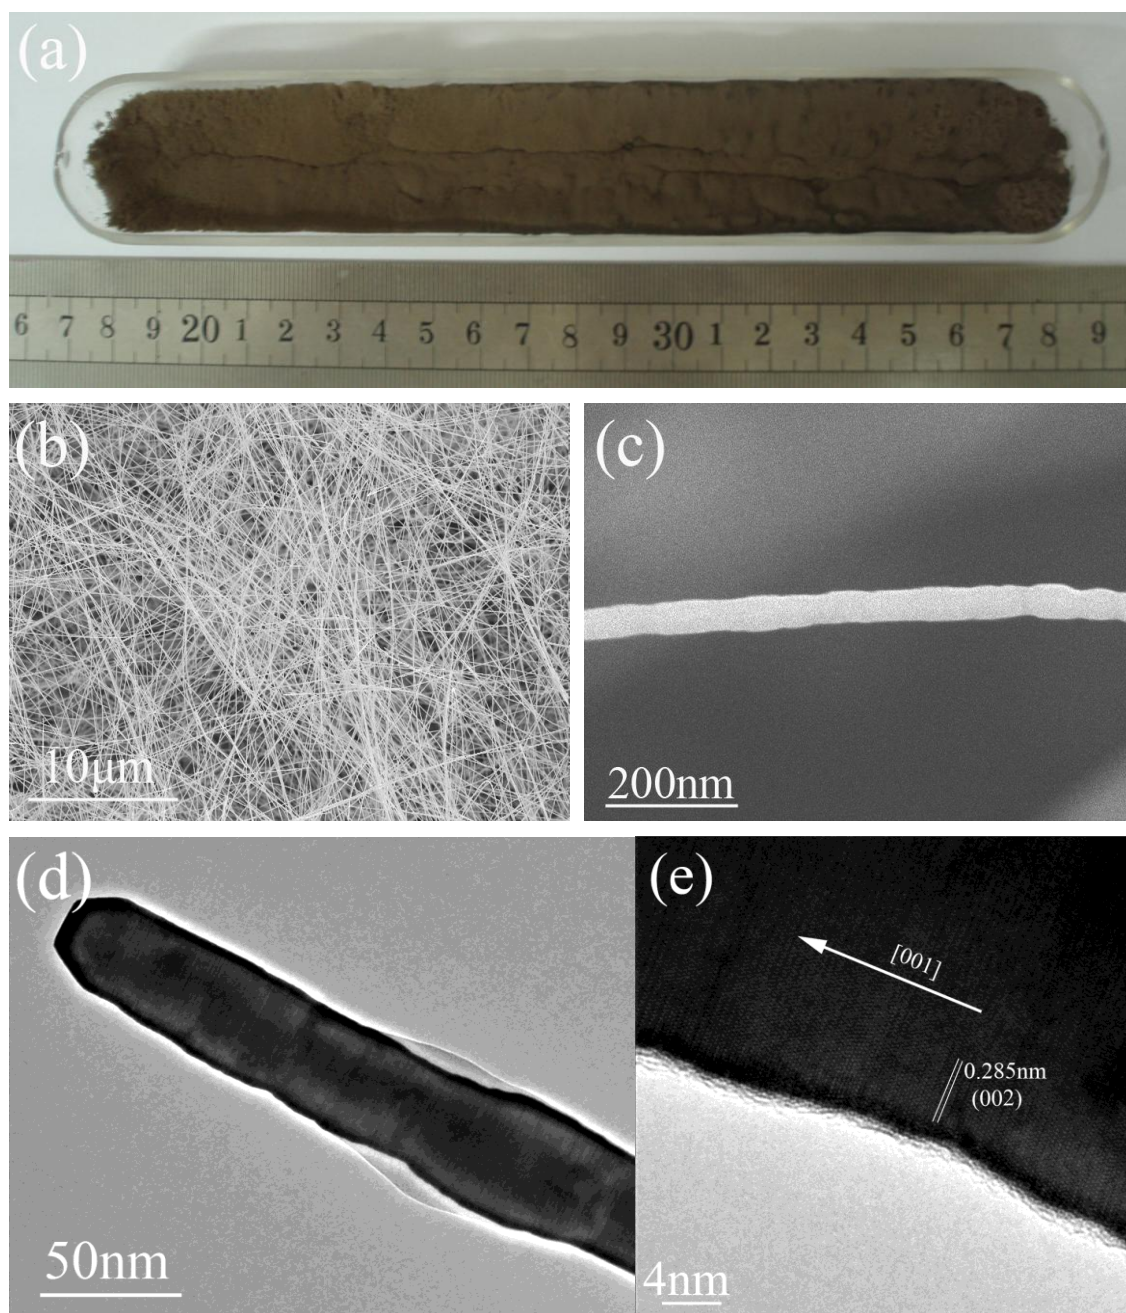

**Figure SI-2** (a) Photograph of synthesized gram-scale InN nanowires; (b) SEM image of the as-synthesized InN nanowires; (c) enlarged SEM image of a single InN nanowire; (d) TEM image of a single InN nanowire; (e) HRTEM image of the single InN nanowire.

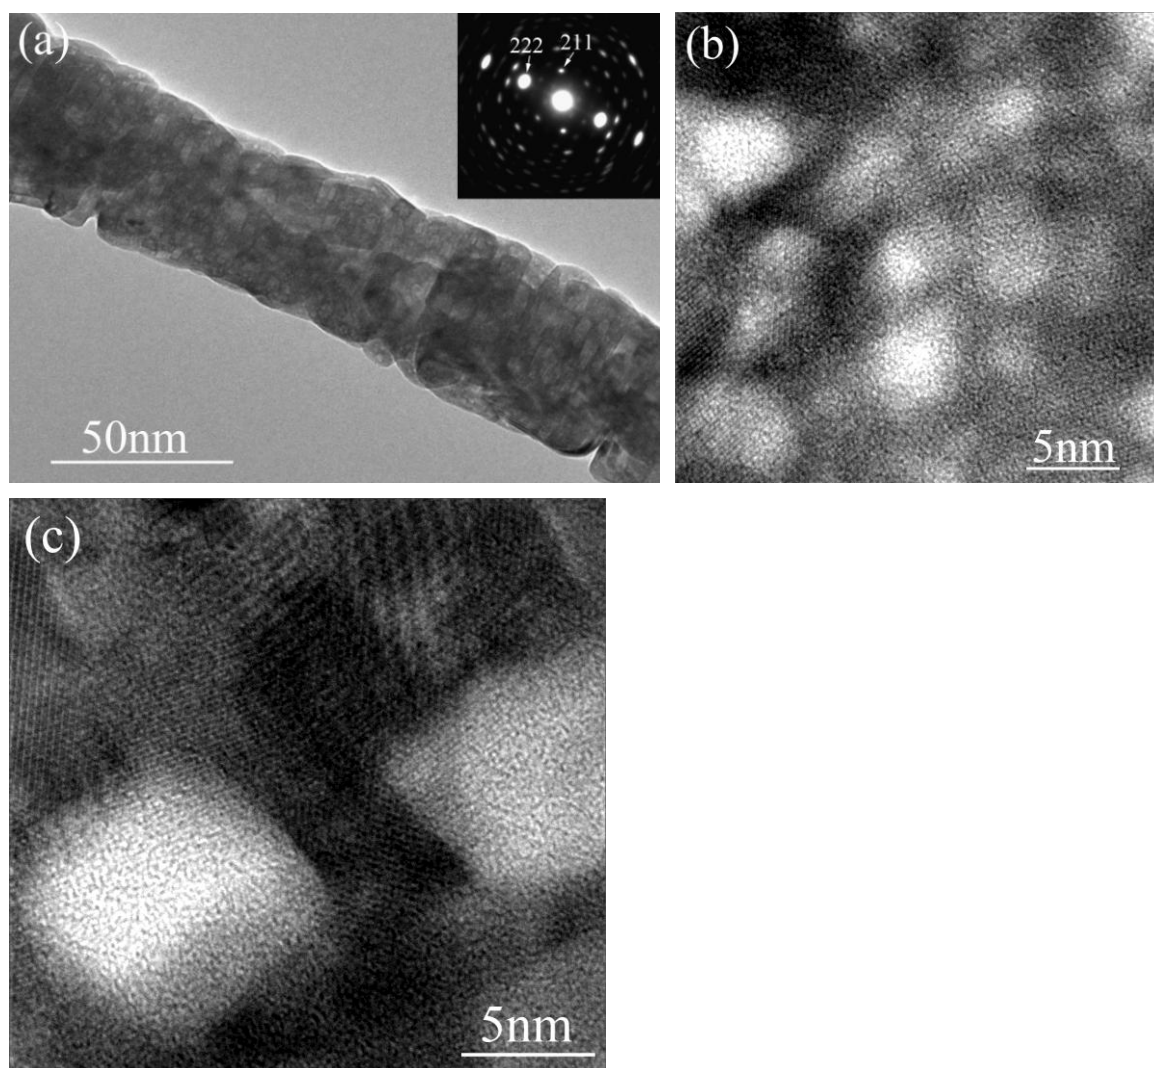

**Figure SI-3** TEM image (a), SAED pattern (inset), HRTEM image (b) and (c) of a single porous  $\text{In}_2\text{O}_3$  nanowire, showing its high density of ultra-fine nanopores.

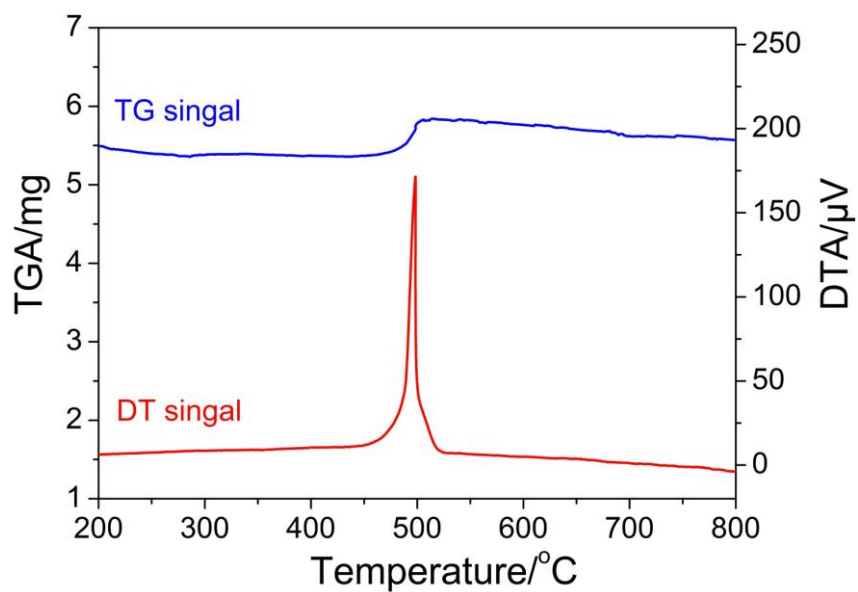

**Figure SI-4** A typical DTA-TGA curve obtained for the  $\text{InN}$  precursor under air atmosphere.

### Experimental details for synthesis of $\text{In}_2\text{O}_3$ octahedra

The synthesis of  $\text{In}_2\text{O}_3$  regular octahedra was accomplished by a simple vapour-solid (VS) route. An alumina boat containing pure In powders (1-2 g, 200 meshes) was placed in the front of an alumina boat was placed in the middle of a horizontal quartz tube furnace. In the first step, the quartz tube was pumped, and then filled with argon and re-pumped. After repeating the operation three times, the quartz tube was full of argon atmosphere. Then, the quartz tube was heated to  $650^\circ\text{C}$  in one hour under an argon flow of 30 standard cubic centimeters per minute (sccm). After the temperature reached  $650^\circ\text{C}$ , the argon flow was turned off, and an oxygen flow of 1 sccm was introduced into the quartz tube to react with the In vapor for half an hour. Then, the oxygen flow was turned off, and the furnace was naturally cooled under an argon flow of 30 sccm.

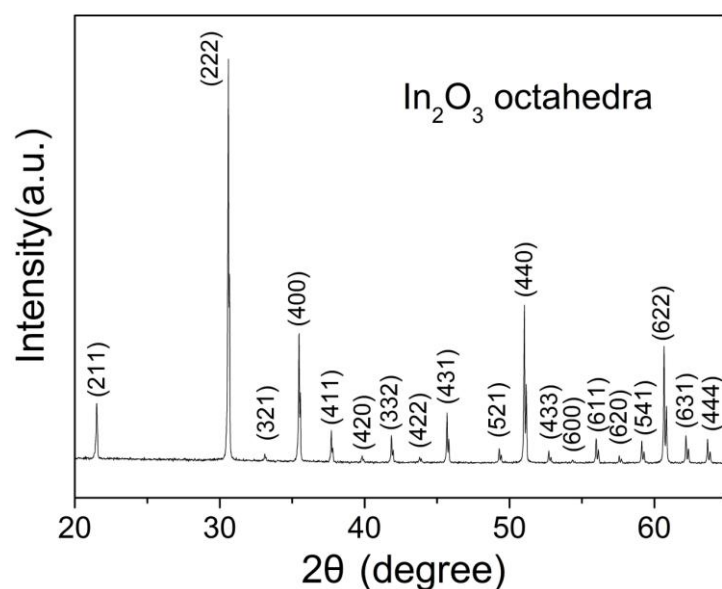

**Figure SI-5. X-ray diffraction pattern (XRD) of the product can be well indexed to a cubic cell with  $a = b = c = 10.118 \text{ \AA}$ , in good agreement with the  $\text{In}_2\text{O}_3$  standard data (ICDD-PDF 06-0416).**

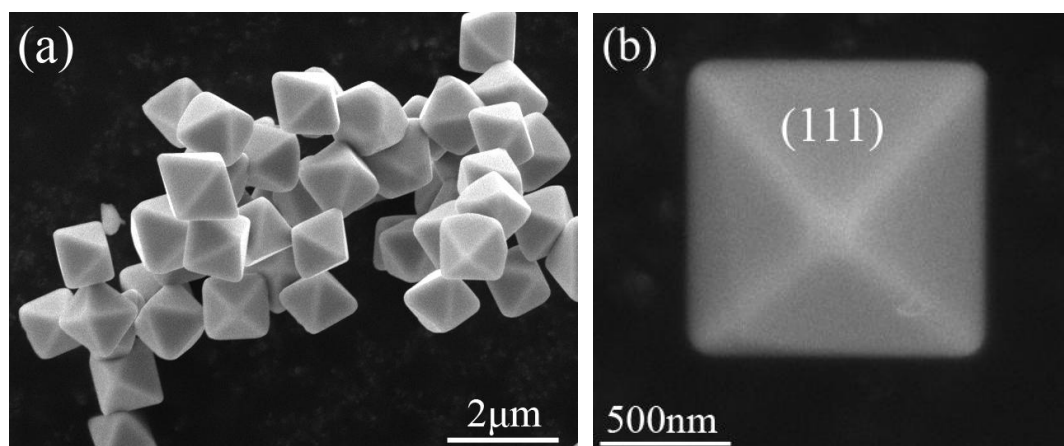

**Figure SI-6. SEM images of  $\text{In}_2\text{O}_3$  octahedra at different magnifications.**

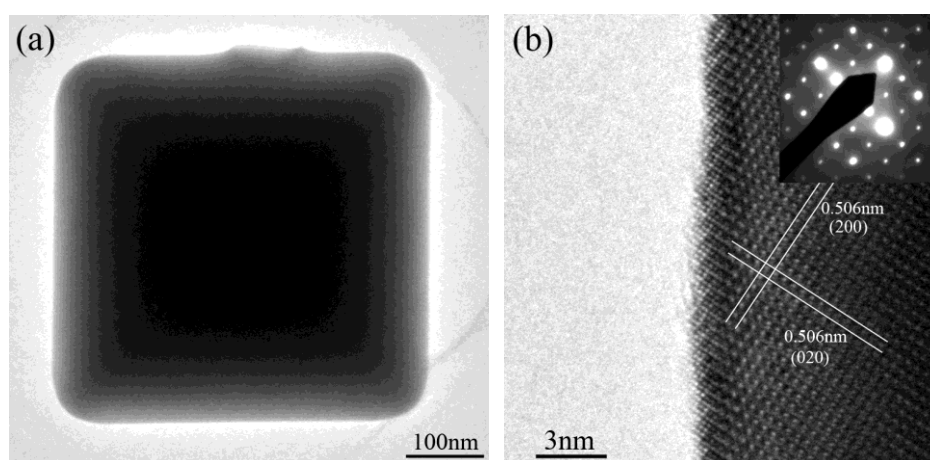

**Figure SI-7. TEM image (a), HRTEM image (b) and SAED pattern (inset) of a single  $\text{In}_2\text{O}_3$  octahedron.**

### ***Experimental details for synthesis of $\text{SnO}_2$ nanobelts***

The synthesis of  $\text{SnO}_2$  nanobelts was accomplished by a simple vapour-solid (VS) route. An alumina boat containing pure Sn powders (1-2 g, 200 meshes) was placed in the front of an alumina hollow tube 25 mm in (inner) diameter and 22 cm in length. The alumina hollow tube together with the alumina boat was placed in the middle of a horizontal quartz tube furnace. In the first step, the quartz tube was pumped, and then filled with argon and re-pumped. After repeating the operation three times, the quartz tube was full of argon atmosphere. Then, the quartz tube was heated to  $900^\circ\text{C}$  in one hour under an argon flow of 30 standard cubic centimeters per minute (sccm). After the temperature reached  $900^\circ\text{C}$ , the argon flow was turned off, and an oxygen flow of 5 sccm was introduced into the quartz tube to react with the excess Sn vapor for half an hour. Then, the oxygen flow was turned off, and the furnace was naturally cooled under an argon flow of 30 sccm.

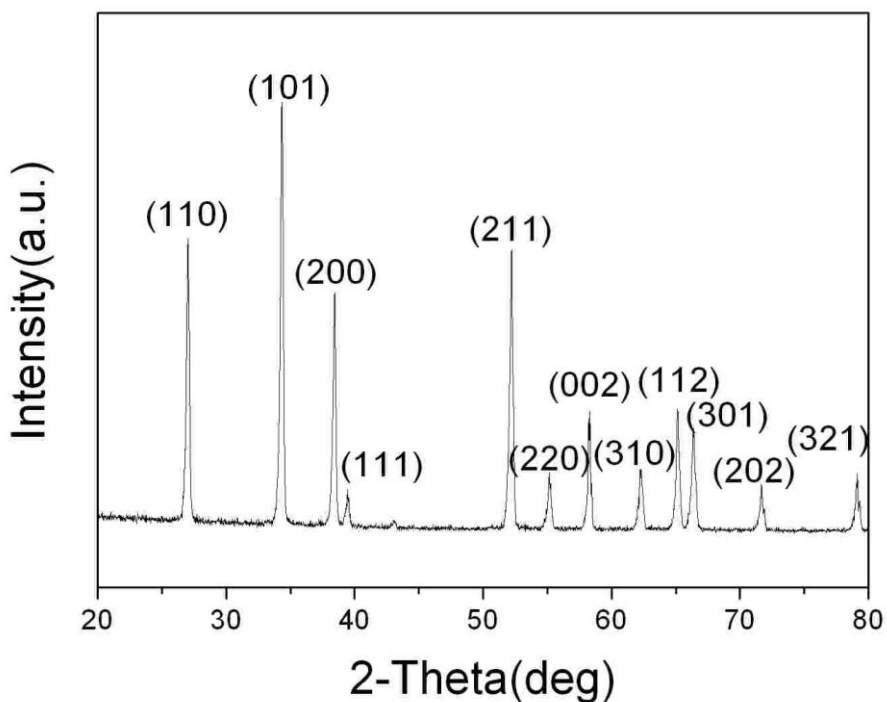

**Figure SI-8.** X-ray diffraction pattern (XRD) of the nanobelts shows that the product is  $\text{SnO}_2$  in a rutile-type structure ( $P4_2/mnm$ ).

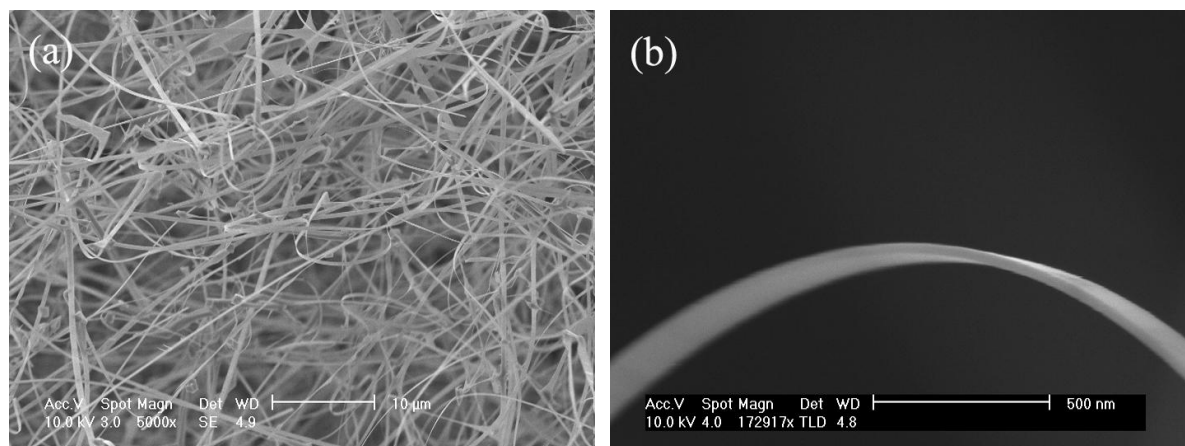

**Figure SI-9.** SEM images of  $\text{SnO}_2$  nanobelts at different magnifications.

| Ethanol gas concentration | 2ppm | 20ppm | 50ppm | 100 ppm |
|---------------------------|------|-------|-------|---------|
| Response time             | 6s   | 4s    | 3s    | 5 s     |
| Recovery time             | 7s   | 5s    | 4s    | 7 s     |

**Table SI-1.** The response and recovery times of porous  $\text{In}_2\text{O}_3$  nanowire films towards different ethanol concentration

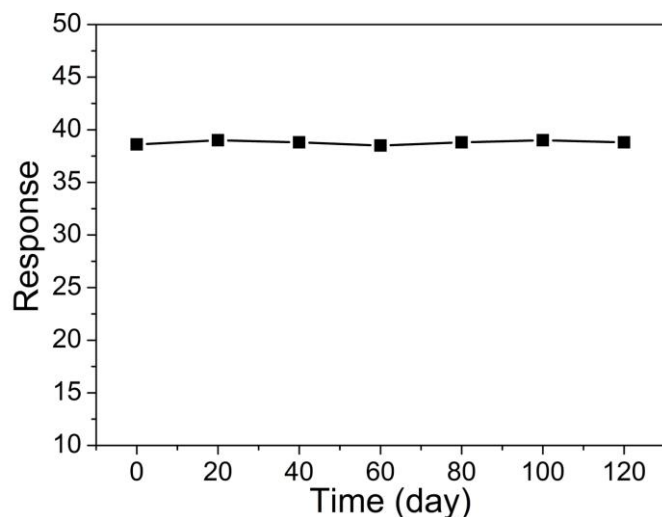

**Figure SI-10.** The long-term stability of porous  $\text{In}_2\text{O}_3$  nanowire film sensors to 50 ppm ethanol gas at 260 °C

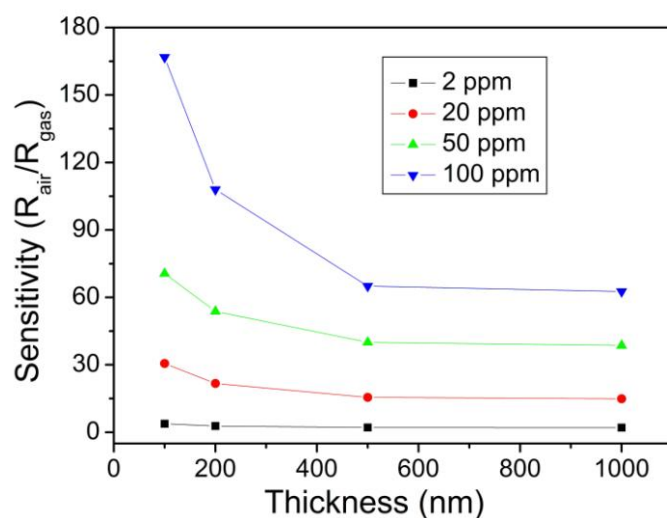

**Figure SI-11.** Variation of sensitivity of porous  $\text{In}_2\text{O}_3$  nanowire film sensors with film thickness for different concentrations of ethanol vapor.

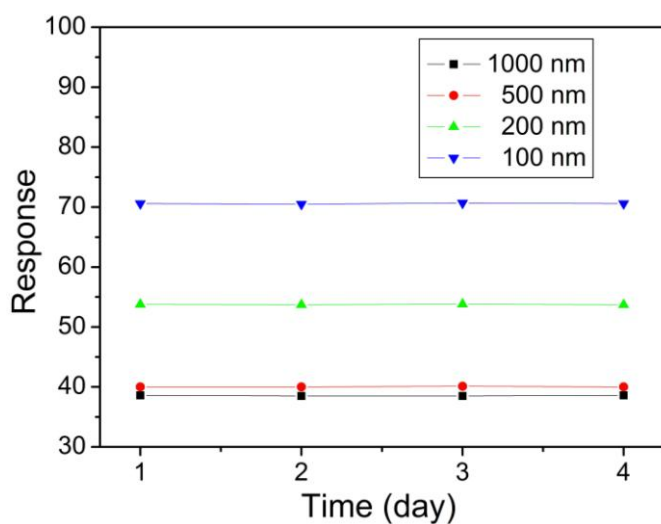

**Figure SI-12.** The stability of the response of porous  $\text{In}_2\text{O}_3$  nanowire film sensors with different thickness to 50 ppm ethanol gas at 260 °C.
